# Supplementary material
Source: publisher figshare collection journal article supplement (https://tandf.figshare.com/ndownloader/files/22643750)
Supplement: Supplementary file 1 [file 22643750]

function [ FittedCenter, FittedRadius, SumOfSquares, Hessian, Residuals,...
    Jacobian, ExitFlag, Output, Lambda, Sensitivities ] = ...
    FitCircleOrSphereToData( Data, Center )
%%%%%%%%%1%%%%%%%%%2%%%%%%%%%3%%%%%%%%4%%%%%%%%%5%%%%%%%%%6%%%%%%%%%7%%%%%%
%%
%%  FitCircleOrSphereToData( Data, Center )
%%  fits a circle in R2, sphere in R3, or hypersphere in Rn, to Data in Rn,
%%  optionally starting from a tentative center at Center.
%%
%%  REQUIRED MATLAB TOOLBOX:  
%%  Optimization Toolbox
%%
%%  REQUIRED MATLAB ROUTINE:  
%%  lsqnonlin:  from the Optimization Toolbox
%%
%%  DATA:
%%  REQUIRED DATA:  
%%  Data:  real, ( N x L ) array containing one data point in Rn per line:
%%  x1  y1, ..., x1L 
%%  x2  y2, ..., x2L
%%  :   :
%%  xN  yN, ..., xNL
%%  L = 2 for data in the plane, L = 3, for data in space, etc., N > L.  
%%
%%  OPTIONAL ADDITIONAL DATA:  
%%  Center:  real, 1xL, estimates of the center, W = ( W1, ..., WL ).
%%           
%%  RESULTS
%%  Results are arranged approximately by increasing size:
%%  FittedCenter: real (1xL) array, center of the fitted circle or sphere.           
%%  FittedRadius: real, radius of the fitted circle or sphere.           
%%  SumOfSquares: real, sum of squared residuals at the fitted circle.           
%%  Hessian:      real (LxL) array, Hessian matrix of the Sum of Squares.
%%  Residuals:    real (Nx1) array, signed distances from circle to data.
%%  Jacobian:     real (NxL) array, Jacobian matrix of the Sum of Squares.
%%  ExitFlag:     exit condition returned by lsqnonlin (see documentation).           
%%  Output:       structure returned by lsqnonlin (see documentation).           
%%  Lambda:       Lagrange multiplier from lsqnonlin (see documentation).           
%%  Sensitivities:real (LxNxL) array, partial derivatives of FittedCenter
%%                with respect to each datum x1,...xN, y1,...yN,...
%%  Additional results about fitted lines of total least squares (TLS) and
%%  circles fitted algebraically (minimizing polynomials, not distances)
%%  are printed in a text fle named
%%  'FittedCirclesAndLineResultsInLaTeX.txt'
%%           
%%  EXAMPLES
%%  Set Data = [ 7 7; 6 8; 5 7; 6 6 ];
%%  [FittedCenter,FittedRadius] = FitCircleOrSphereToData( Data );
%%  Optionally set  Center = [ 8 5 ]  to search about this center;
%%  [FittedCenter,FittedRadius] = FitCircleOrSphereToData( Data, Center );
%%           
%%  CREATIVE COMMON LICENSE CC BY-NC-SA
%%  (https://creativecommons.org/licenses/)
%%  granted by Yves Nievergelt.                                           
%%  Last modified on Friday 1 November 2019  
%%
%%%%%%%%%1%%%%%%%%%2%%%%%%%%%3%%%%%%%%4%%%%%%%%%5%%%%%%%%%6%%%%%%%%%7%%%%%%
%%%%%%%%%1%%%%%%%%%2%%%%%%%%%3%%%%%%%%4%%%%%%%%%5%%%%%%%%%6%%%%%%%%%7%%%%%%
%%
%%  START DEFINING SUBROUTINES. 
%%
%%%%%%%%%1%%%%%%%%%2%%%%%%%%%3%%%%%%%%4%%%%%%%%%5%%%%%%%%%6%%%%%%%%%7%%%%%%
%%%%%%%%%1%%%%%%%%%2%%%%%%%%%3%%%%%%%%4%%%%%%%%%5%%%%%%%%%6%%%%%%%%%7%%%%%%
%%
%%  Define a routine that centers the data  X  around their mean,
%%  subtracting the mean of each column from all entries in that column:
%%
%%%%%%%%%1%%%%%%%%%2%%%%%%%%%3%%%%%%%%4%%%%%%%%%5%%%%%%%%%6%%%%%%%%%7%%%%%%
function [ CenteredDataX, ColumnMeansX ] = CenterData( X )
    ColumnMeansX = mean( X );  
	CenteredDataX = X - ones( size( X, 1 ), 1 )*ColumnMeansX;
end
%%%%%%%%%1%%%%%%%%%2%%%%%%%%%3%%%%%%%%4%%%%%%%%%5%%%%%%%%%6%%%%%%%%%7%%%%%%
%%
%%  Define a routine that computes the squared Euclidean norms of all rows: 
%%  The shortcut  diag(Z*(Z'))  overwhelms the system for  N  large enough.
%%
%%%%%%%%%1%%%%%%%%%2%%%%%%%%%3%%%%%%%%4%%%%%%%%%5%%%%%%%%%6%%%%%%%%%7%%%%%%
    function SquaredNormsW = SquaredEuclideanNorms( W )
       [ NW, LW ] = size( W );
       SquaredNormsW = zeros( NW, 1 );
        for I = 1:NW
            SquaredNormsW( I ) = dot( W(I,:), W(I,:) );
        end
    end
%%%%%%%%%1%%%%%%%%%2%%%%%%%%%3%%%%%%%%4%%%%%%%%%5%%%%%%%%%6%%%%%%%%%7%%%%%%
%%
%%  Define a routine multiplying  diag( D ) by a matrix  A.  
%%  The shortcut  diag( D )*A  overwhelms the system for  N  large enough.
%%
%%%%%%%%%1%%%%%%%%%2%%%%%%%%%3%%%%%%%%4%%%%%%%%%5%%%%%%%%%6%%%%%%%%%7%%%%%%
    function DA = DiagonalTimesMatrix( D, A )
       [ NA, LA ] = size( A );
       DA = zeros( size( A ) );
        for I = 1:NA
            DA( I, : ) = D( I )*A( I, : );
        end
    end
%%%%%%%%%1%%%%%%%%%2%%%%%%%%%3%%%%%%%%4%%%%%%%%%5%%%%%%%%%6%%%%%%%%%7%%%%%%
%%
%%  Define a routine that fits a Total Least Squares line or plane to data. 
%%
%%%%%%%%%1%%%%%%%%%2%%%%%%%%%3%%%%%%%%4%%%%%%%%%5%%%%%%%%%6%%%%%%%%%7%%%%%%
function [ MeanZ,SumOfSquaresToMeanZ,NormalToTLSZ,SumOfSquaresToTLSZ] ...
        = FitLineAlgebraically( Z )
%%  Extract the dimensions of the data. 
    [ NZ, LZ ] = size( Z );
%%  Compute the column-means and center the data  Y around their mean:
    [ CenteredDataZ, MeanZ ] = CenterData( Z ); 
%%  Compute the squares of the Euclidean norms of the centered data:
    SquaredNormsZ = SquaredEuclideanNorms( CenteredDataZ ); 
%%  Sum of squared distances to the mean:
    SumOfSquaresToMeanZ = sum( SquaredNormsZ );
%%  Economy-size Singular-Value Decomposition of the centered data:
    [ UZ, SZ, VZ ] = svd( CenteredDataZ, 0 );
%%  Smallest and largest singular values
    SZ11 = SZ(1,1); 
    SZLL = SZ(LZ,LZ); 
%%  Sum of squared distances to the TLS line:
    SumOfSquaresToTLSZ = SZLL^2; 
%%  Unit vector normal to the TLS line:
    NormalToTLSZ = VZ(1:LZ,LZ);
end
%%%%%%%%%1%%%%%%%%%2%%%%%%%%%3%%%%%%%%4%%%%%%%%%5%%%%%%%%%6%%%%%%%%%7%%%%%%
%%
%%  Define a routine that fits a circle or sphere to data algebraically,
%%  based on Walter Gander and Gene H. Golub and Rolf Strebel,
%%  Least-Squares Fitting of Circles and Ellipses, BIT, 34 (1994), 558-578.
%%
%%%%%%%%%1%%%%%%%%%2%%%%%%%%%3%%%%%%%%4%%%%%%%%%5%%%%%%%%%6%%%%%%%%%7%%%%%%
function [ AlgebraicCenterY, AlgebraicRadiusY, AlgebraicSumOfSquaresY ] ...
        = FitCircleAlgebraically( Y )
%%  Extract the dimensions of the data. 
    [ NY, LY ] = size( Y );
%%  Compute the column-means and center the data  Y around their mean:
    [ CenteredDataY, ColumnMeansY ] = CenterData( Y ); 
%%  Compute the squares of the Euclidean norms of the centered data:
    SquaredNormsY = SquaredEuclideanNorms( CenteredDataY ); 
%%  Compute the mean, and center the squared norms around their mean:
    [ CenteredSquaredNormsY, SquaredNormsMeanY ]=CenterData(SquaredNormsY);
%%  Apend the centered squared Euclidean norms to the centered data:
    M = LY + 1;
    ColumnMeansY( M ) = SquaredNormsMeanY;
    CenteredDataY( :, M ) = CenteredSquaredNormsY;
%%  Economy-size Singular-Value Decomposition of the centered data:
    [ UY, SY, VY ] = svd( CenteredDataY, 0 );
%%  Smallest and largest singular values
    SY11 = SY(1,1); 
    SYLL = SY(LY,LY); 
    SYMM = SY(M,M); 
%%  Condition number
    Kappa = SY11/( SYLL - SYMM ); 
%% Constant term, which is the last coordinate of the last singular vector:
    VM = VY(M, M );
    V0 = -SquaredNormsMeanY*VM;
%%  Determine whether the solution is a circle or a line:
    if VM ~= 0
%%  Compute the center and radius of the algebraically fitted circle:
        Z = -VY(1:LY,M)/VM;
        AlgebraicRadiusY = sqrt( SquaredNormsMeanY + (Z'*Z)/4 ); 
        AlgebraicCenterY = ColumnMeansY( 1:LY )' + (Z/2); 
 %%  Compute the sum of squares to the algebraically fitted circle:
    AlgebraicResidualsY = JacobianResiduals( Data, AlgebraicCenterY ); 
    AlgebraicSumOfSquaresY=dot( AlgebraicResidualsY,AlgebraicResidualsY ); 
    else
%% Replace the center by a vector normal to the algebraically fitted line:
    AlgebraicCenterY = V(1:L,1:L);
    AlgebraicRadiusY = Inf; 
    end
end
%%%%%%%%%1%%%%%%%%%2%%%%%%%%%3%%%%%%%%4%%%%%%%%%5%%%%%%%%%6%%%%%%%%%7%%%%%%
%%
%%  Define a routine that returns the Jacobian, residuals, radii, Radius,.. 
%%
%%%%%%%%%1%%%%%%%%%2%%%%%%%%%3%%%%%%%%4%%%%%%%%%5%%%%%%%%%6%%%%%%%%%7%%%%%%
function [ Residuals, Jacobian, Radii, ReciprocalRadii, SquaredRadii, ...
Radius, CenteredData, CenteredDataOverRadii ] ...
            = JacobianResiduals( DataJ, Center )
%%  Center the data around the current center W = [ W1, ..., WL ]:
%%  Define residuals to be positive for points outside the circle:
%%  Here the center has length  L  but may be a row or column vector:
    CenteredData = ones( size( DataJ ) )*diag( Center ) - DataJ;  
%%  Compute all the distances (radii) from the current center to points:
    SquaredRadii = SquaredEuclideanNorms( CenteredData );
    Radii = sqrt( SquaredRadii );  
    ReciprocalRadii = 1./Radii;
%%  Compute the mean of the distances from the current center to points:
    Radius = mean( Radii );
%%  Compute all the signed distances (residuals) from the circle to points:
%%  Define residuals to be positive for points outside the circle:
    Residuals = Radii - Radius;
%    Jacobian = DiagonalTimesMatrix( ReciprocalRadii, CenteredData );
%%  Normalize the centered points by their distance to the center:
CenteredDataOverRadii = DiagonalTimesMatrix(ReciprocalRadii,CenteredData);
%    Jacobian = diag( ReciprocalRadii )*CenteredData;   
%%  Center the normalized points around their mean:
    Jacobian = CenterData( CenteredDataOverRadii ); 
%    Jacobian = Jacobian - ones(size( Jacobian) )*diag( mean( Jacobian ) );
%    Jacobian = Jacobian - ones( size( Jacobian, 1), 1 )*mean( Jacobian );
%%  End of the "nested" function. 
end
%%%%%%%%%1%%%%%%%%%2%%%%%%%%%3%%%%%%%%4%%%%%%%%%5%%%%%%%%%6%%%%%%%%%7%%%%%%
%%
%%  Define a "nested" vector-valued function that returns the residuals. 
%%
%%%%%%%%%1%%%%%%%%%2%%%%%%%%%3%%%%%%%%4%%%%%%%%%5%%%%%%%%%6%%%%%%%%%7%%%%%%
function [ Residuals, Jacobian ] = ArrayOfResiduals( Center )
%%  Center the data around the current center W = [ W1, ..., WL ]:
    [ Residuals, Jacobian, Radii, ReciprocalRadii, SquaredRadii, ...
Radius, CenteredData, CenteredDataOverRadii ] ...
    = JacobianResiduals( Data, Center ); 
%%  End of the "nested" function. 
end
%%%%%%%%%1%%%%%%%%%2%%%%%%%%%3%%%%%%%%4%%%%%%%%%5%%%%%%%%%6%%%%%%%%%7%%%%%%
%%
%%  END DEFINING SUBROUTINES. 
%%
%%%%%%%%%1%%%%%%%%%2%%%%%%%%%3%%%%%%%%4%%%%%%%%%5%%%%%%%%%6%%%%%%%%%7%%%%%%
%%%%%%%%%1%%%%%%%%%2%%%%%%%%%3%%%%%%%%4%%%%%%%%%5%%%%%%%%%6%%%%%%%%%7%%%%%%
%%
%%  START COMPUTATIONS. 
%%
%%%%%%%%%1%%%%%%%%%2%%%%%%%%%3%%%%%%%%4%%%%%%%%%5%%%%%%%%%6%%%%%%%%%7%%%%%%
%%  Extract the dimensions of the data. 
[ N, L ] = size( Data );
%%%%%%%%%1%%%%%%%%%2%%%%%%%%%3%%%%%%%%4%%%%%%%%%5%%%%%%%%%6%%%%%%%%%7%%%%%%
%%
%%  Check whether  Data  is a real array with  N > L.  If not, then stop. 
%%
%%%%%%%%%1%%%%%%%%%2%%%%%%%%%3%%%%%%%%4%%%%%%%%%5%%%%%%%%%6%%%%%%%%%7%%%%%%
if N <= L
   sprintf('The number of points (N) does not exceed their dimension (L).')
    elseif ~isnumeric( Data )
        sprintf('The data are not all numeric.')
    elseif ~isreal( Data )
        sprintf('The data are not all real-valued.')  
    elseif ~isequal( isfinite( ones( size( Data ) ) ), isfinite( Data ) )
       sprintf('The data do not all have finite values.')  
else
%%  Specify a unit radius, for later comparisons. 
Radius = 1;
%%%%%%%%%1%%%%%%%%%2%%%%%%%%%3%%%%%%%%4%%%%%%%%%5%%%%%%%%%6%%%%%%%%%7%%%%%%
%%
%%  Compute the Total Least Squares line.
%%  Compute the sum of squared distances to the mean and to the TLS line.
%%
%%%%%%%%%1%%%%%%%%%2%%%%%%%%%3%%%%%%%%4%%%%%%%%%5%%%%%%%%%6%%%%%%%%%7%%%%%%
[MeanOfData,SumOfSquaresToMean,NormalToTLS,SumOfSquaresToTLS] ...
        = FitLineAlgebraically( Data )
%%%%%%%%%1%%%%%%%%%2%%%%%%%%%3%%%%%%%%4%%%%%%%%%5%%%%%%%%%6%%%%%%%%%7%%%%%%
%%
%%  Compute the circle fitted algebraically (Gander, Golub, and Strebel).
%%  Compute the sum of squared distances to the algebraic circle.
%%
%%%%%%%%%1%%%%%%%%%2%%%%%%%%%3%%%%%%%%4%%%%%%%%%5%%%%%%%%%6%%%%%%%%%7%%%%%%
[ AlgebraicCenter, AlgebraicRadius, AlgebraicSumOfSquares ] ...
        = FitCircleAlgebraically( Data )
%%%%%%%%%1%%%%%%%%%2%%%%%%%%%3%%%%%%%%4%%%%%%%%%5%%%%%%%%%6%%%%%%%%%7%%%%%%
%%
%%  If the user gave no initial estimates of the Center, then supply one: 
%%  If the user estimated the Center, then compute the radius for it: 
%%
%%%%%%%%%1%%%%%%%%%2%%%%%%%%%3%%%%%%%%4%%%%%%%%%5%%%%%%%%%6%%%%%%%%%7%%%%%%
switch nargin
   case 1
        Center = AlgebraicCenter; 
        Radius = AlgebraicRadius;
%[ Center, Radius ] = FitCircleAlgebraically( Data );
    case 2
        [ Residuals, Jacobian, Radii, ReciprocalRadii, SquaredRadii, ...
            Radius, CenteredData, CenteredDataOverRadii ] ...
            = JacobianResiduals( Data, Center ); 
end
%%%%%%%%%1%%%%%%%%%2%%%%%%%%%3%%%%%%%%4%%%%%%%%%5%%%%%%%%%6%%%%%%%%%7%%%%%%
%%
%%  Here either the user supplied a center, in which case 
%%       JacobianResiduals provided a tentative radius,
%%       or  FitCircleAlgebraically  provided  Radius = AlgebraicRadius,
%%           which may be  Inf  if it did not find a better fitting circle.
%%   Only fit a circle or sphere if  Radius  is not  Inf.
%%
%%%%%%%%%1%%%%%%%%%2%%%%%%%%%3%%%%%%%%4%%%%%%%%%5%%%%%%%%%6%%%%%%%%%7%%%%%%
if isfinite( Radius )
%%%%%%%%%1%%%%%%%%%2%%%%%%%%%3%%%%%%%%4%%%%%%%%%5%%%%%%%%%6%%%%%%%%%7%%%%%%
%%
%%  Find the minimum sum of squared residuals. 
%%
%%%%%%%%%1%%%%%%%%%2%%%%%%%%%3%%%%%%%%4%%%%%%%%%5%%%%%%%%%6%%%%%%%%%7%%%%%%
Options = optimoptions( 'lsqnonlin', 'Jacobian', 'on' );
[ FittedCenter, SumOfSquares, Residuals, ...
    ExitFlag, Output, Lambda, Jacobian ] =  ...
    lsqnonlin( @ArrayOfResiduals, Center, [ ], [ ], Options ); 
%%%%%%%%%1%%%%%%%%%2%%%%%%%%%3%%%%%%%%4%%%%%%%%%5%%%%%%%%%6%%%%%%%%%7%%%%%%
%%
%%  Compute the coefficients of determinations. 
%%
%%%%%%%%%1%%%%%%%%%2%%%%%%%%%3%%%%%%%%4%%%%%%%%%5%%%%%%%%%6%%%%%%%%%7%%%%%%
R2FittedCircleAndMean = 1 - ( SumOfSquares/SumOfSquaresToMean );
R2FittedCircleAndLine = 1 - ( SumOfSquares/SumOfSquaresToTLS );
R2LineTLSAndMean = 1 - ( SumOfSquaresToTLS/SumOfSquaresToMean );
R2AlgebraicCircleAndMean = 1 - (AlgebraicSumOfSquares/SumOfSquaresToMean);
R2AlgebraicCircleAndLine = 1 - (AlgebraicSumOfSquares/SumOfSquaresToTLS);
R2FittedCircleAndAlgebraicCircle = 1-(SumOfSquares/AlgebraicSumOfSquares);
%%%%%%%%%1%%%%%%%%%2%%%%%%%%%3%%%%%%%%4%%%%%%%%%5%%%%%%%%%6%%%%%%%%%7%%%%%%
%%
%%  Convert the sparse structure returned by lsqnonlin into a full matrix. 
%%
%%%%%%%%%1%%%%%%%%%2%%%%%%%%%3%%%%%%%%4%%%%%%%%%5%%%%%%%%%6%%%%%%%%%7%%%%%%
FullJacobian = full( Jacobian );
%%%%%%%%%1%%%%%%%%%2%%%%%%%%%3%%%%%%%%4%%%%%%%%%5%%%%%%%%%6%%%%%%%%%7%%%%%%
%%
%%  Compute the fitted radius. 
%%
%%%%%%%%%1%%%%%%%%%2%%%%%%%%%3%%%%%%%%4%%%%%%%%%5%%%%%%%%%6%%%%%%%%%7%%%%%%
   [ Residuals, Jacobian, Radii, ReciprocalRadii, SquaredRadii, ...
        FittedRadius, CenteredData, CenteredDataOverRadii ] = ... 
                                  JacobianResiduals( Data, FittedCenter ); 
%%%%%%%%%1%%%%%%%%%2%%%%%%%%%3%%%%%%%%4%%%%%%%%%5%%%%%%%%%6%%%%%%%%%7%%%%%%
%%
%%  Print some results in the command window. 
%%
%%%%%%%%%1%%%%%%%%%2%%%%%%%%%3%%%%%%%%4%%%%%%%%%5%%%%%%%%%6%%%%%%%%%7%%%%%%
FittedCenter
FittedRadius
SumOfSquares
%%%%%%%%%1%%%%%%%%%2%%%%%%%%%3%%%%%%%%4%%%%%%%%%5%%%%%%%%%6%%%%%%%%%7%%%%%%
%%
%%  Compute the Hessian matrix and sensitivities to order 0 in residuals. 
%%
%%%%%%%%%1%%%%%%%%%2%%%%%%%%%3%%%%%%%%4%%%%%%%%%5%%%%%%%%%6%%%%%%%%%7%%%%%%
%%%%%%%%%1%%%%%%%%%2%%%%%%%%%3%%%%%%%%4%%%%%%%%%5%%%%%%%%%6%%%%%%%%%7%%%%%%
%%
%%  Second partial derivatives of the objective sum of squares, accurate
%%  to the first order in the partial derivatives of the residuals:
%%
%%%%%%%%%1%%%%%%%%%2%%%%%%%%%3%%%%%%%%4%%%%%%%%%5%%%%%%%%%6%%%%%%%%%7%%%%%%
Hessian = ( FullJacobian' )*FullJacobian;  
%%%%%%%%%1%%%%%%%%%2%%%%%%%%%3%%%%%%%%4%%%%%%%%%5%%%%%%%%%6%%%%%%%%%7%%%%%%
%%
%%  Additions to second partial derivatives of the objective sum of squares
%%  to the second order in the partial derivatives of the residuals:
%%
%%%%%%%%%1%%%%%%%%%2%%%%%%%%%3%%%%%%%%4%%%%%%%%%5%%%%%%%%%6%%%%%%%%%7%%%%%%
HessianMatrix = Hessian;
ResidualsPartials = FullJacobian;
for I = 1:L
    for J = I:L
        HessianMatrix(I,J) = HessianMatrix(I,J) - ...
        dot(Residuals, ...
        ResidualsPartials(:,I).*ResidualsPartials(:,J).*ReciprocalRadii);  
        HessianMatrix(J,I) = HessianMatrix(I,J); 
    end
end
Constant = dot( Residuals, ReciprocalRadii );  
ConstantDiagonal = Constant*ones( size( L ) );
Hessian = HessianMatrix + diag( ConstantDiagonal );  
%%%%%%%%%1%%%%%%%%%2%%%%%%%%%3%%%%%%%%4%%%%%%%%%5%%%%%%%%%6%%%%%%%%%7%%%%%%
%%
%%  Print some results in the command window. 
%%
%%%%%%%%%1%%%%%%%%%2%%%%%%%%%3%%%%%%%%4%%%%%%%%%5%%%%%%%%%6%%%%%%%%%7%%%%%%
Hessian
%%%%%%%%%1%%%%%%%%%2%%%%%%%%%3%%%%%%%%4%%%%%%%%%5%%%%%%%%%6%%%%%%%%%7%%%%%%
%%
%%  SAVE SOME RESULTS IN LaTeX TABLES TO BE READ LATER BY LaTeX
%%
%%%%%%%%%1%%%%%%%%%2%%%%%%%%%3%%%%%%%%4%%%%%%%%%5%%%%%%%%%6%%%%%%%%%7%%%%%%
%%%%%%%%%1%%%%%%%%%2%%%%%%%%%3%%%%%%%%4%%%%%%%%%5%%%%%%%%%6%%%%%%%%%7%%%%%%
%%
%%  Print some results in a text file that may be used as a LaTeX table:
%%
%%%%%%%%%1%%%%%%%%%2%%%%%%%%%3%%%%%%%%4%%%%%%%%%5%%%%%%%%%6%%%%%%%%%7%%%%%%
FileID = fopen( 'FittedCirclesAndLineResultsInLaTeX.txt', 'w' );   
%%  LaTeX code for the beginning of a table with at least 9 columns:
    fprintf( FileID, '\\begin{tabular}{ c c c c c c c c c }' );
%%  LaTeX code for carriage return:
    fprintf( FileID, '\n' );
%%  LaTeX code for a horizontal line in a table:
    fprintf( FileID, '\\hline\n' );
%%  LaTeX code for line of text spanning columns:
    fprintf( FileID, '\\multicolumn{3}{c}{Fitted object}&\n' );
    fprintf( FileID, '\\multicolumn{1}{c}{Sum of squared}&\n' );
    fprintf( FileID, '\\multicolumn{3}{c}{$R^2$ with respect to}&\n' );
%%  LaTeX code for carriage return:
    fprintf( FileID, '\\' );
    fprintf( FileID, '\\ \n' );
    fprintf( FileID, '&&&distances to object&Mean&Line&Algebraic circle\n' );
%%  LaTeX code for carriage return:
    fprintf( FileID, '\\' );
    fprintf( FileID, '\\ \n' );
%%  LaTeX code for a horizontal line in a table:
    fprintf( FileID, '\\hline\n' );
%%%%%%%%%1%%%%%%%%%2%%%%%%%%%3%%%%%%%%4%%%%%%%%%5%%%%%%%%%6%%%%%%%%%7%%%%%%
%%
%%  MEAN:
%%
%%%%%%%%%1%%%%%%%%%2%%%%%%%%%3%%%%%%%%4%%%%%%%%%5%%%%%%%%%6%%%%%%%%%7%%%%%%
    fprintf( FileID, '\\multicolumn{3}{l}{One point (the mean)}\n' );
%%  LaTeX code for carriage return:
    fprintf( FileID, '\\' );
    fprintf( FileID, '\\ \n' );
    fprintf( FileID, '$\\overline{ x }$&$\\overline{ y }$\n' );
%%  LaTeX code for carriage return:
    fprintf( FileID, '\\' );
    fprintf( FileID, '\\ \n' );
%%%%%%%%%1%%%%%%%%%2%%%%%%%%%3%%%%%%%%4%%%%%%%%%5%%%%%%%%%6%%%%%%%%%7%%%%%%
%%
%%  Print the mean of the data:
%%
%%%%%%%%%1%%%%%%%%%2%%%%%%%%%3%%%%%%%%4%%%%%%%%%5%%%%%%%%%6%%%%%%%%%7%%%%%%
for I = 1:L
%%  Print coordinate number I of the mean:
    fprintf( FileID, '%1.6g&', MeanOfData( I ) );
end
%%%%%%%%%1%%%%%%%%%2%%%%%%%%%3%%%%%%%%4%%%%%%%%%5%%%%%%%%%6%%%%%%%%%7%%%%%%
%%
%%  Skip a blank field and print the sum of squared distances to the data:
%%
%%%%%%%%%1%%%%%%%%%2%%%%%%%%%3%%%%%%%%4%%%%%%%%%5%%%%%%%%%6%%%%%%%%%7%%%%%%
    fprintf( FileID, '&%1.6g&', SumOfSquaresToMean );
%%  LaTeX code for carriage return:
    fprintf( FileID, '\n' );
    fprintf( FileID, '\\' );
    fprintf( FileID, '\\ \n' );
%%  LaTeX code for a horizontal line in a table:
    fprintf( FileID, '\\hline\n' );
%%%%%%%%%1%%%%%%%%%2%%%%%%%%%3%%%%%%%%4%%%%%%%%%5%%%%%%%%%6%%%%%%%%%7%%%%%%
%%
%%  TLS LINE:
%%
%%%%%%%%%1%%%%%%%%%2%%%%%%%%%3%%%%%%%%4%%%%%%%%%5%%%%%%%%%6%%%%%%%%%7%%%%%%
    fprintf( FileID, '\\multicolumn{7}{l}{Line of Total Least Squares (TLS), through the mean}\n' );
%%  LaTeX code for carriage return:
    fprintf( FileID, '\\' );
    fprintf( FileID, '\\ \n' );
    fprintf( FileID, '\\multicolumn{2}{c}{Unit normal vector}\n' );
%%  LaTeX code for carriage return:
    fprintf( FileID, '\\' );
    fprintf( FileID, '\\ \n' );
%%%%%%%%%1%%%%%%%%%2%%%%%%%%%3%%%%%%%%4%%%%%%%%%5%%%%%%%%%6%%%%%%%%%7%%%%%%
%%
%%  Print the unit vector normal to the line of Total Least Squares:
%%
%%%%%%%%%1%%%%%%%%%2%%%%%%%%%3%%%%%%%%4%%%%%%%%%5%%%%%%%%%6%%%%%%%%%7%%%%%%
for I = 1:L
%%  Print coordinate number I of the unit normal vector:
    fprintf( FileID, '%1.6g&', NormalToTLS( I ) );
end
%%%%%%%%%1%%%%%%%%%2%%%%%%%%%3%%%%%%%%4%%%%%%%%%5%%%%%%%%%6%%%%%%%%%7%%%%%%
%%
%%  Skip a blank field and print the sum of squared distances to the line:
%%
%%%%%%%%%1%%%%%%%%%2%%%%%%%%%3%%%%%%%%4%%%%%%%%%5%%%%%%%%%6%%%%%%%%%7%%%%%%
    fprintf( FileID, '&%1.6g&', SumOfSquaresToTLS );
%%%%%%%%%1%%%%%%%%%2%%%%%%%%%3%%%%%%%%4%%%%%%%%%5%%%%%%%%%6%%%%%%%%%7%%%%%%
%%
%%  Print the coefficient R2 for the TLS line and the Mean point:
%%
%%%%%%%%%1%%%%%%%%%2%%%%%%%%%3%%%%%%%%4%%%%%%%%%5%%%%%%%%%6%%%%%%%%%7%%%%%%
    fprintf( FileID, '%1.6g&', R2LineTLSAndMean );
%%  LaTeX code for carriage return:
    fprintf( FileID, '\n' );
    fprintf( FileID, '\\' );
    fprintf( FileID, '\\ \n' );
%%  LaTeX code for a horizontal line in a table:
    fprintf( FileID, '\\hline\n' );
%%%%%%%%%1%%%%%%%%%2%%%%%%%%%3%%%%%%%%4%%%%%%%%%5%%%%%%%%%6%%%%%%%%%7%%%%%%
%%
%%  ALGEBRAIC CIRCLE:
%%
%%%%%%%%%1%%%%%%%%%2%%%%%%%%%3%%%%%%%%4%%%%%%%%%5%%%%%%%%%6%%%%%%%%%7%%%%%%
    fprintf( FileID, '\\multicolumn{3}{l}{Algebraic circle}\n' );
%%  LaTeX code for carriage return:
    fprintf( FileID, '\\' );
    fprintf( FileID, '\\ \n' );
    fprintf( FileID, '\\multicolumn{2}{c}{Center}&Radius\n' );
%%  LaTeX code for carriage return:
    fprintf( FileID, '\\' );
    fprintf( FileID, '\\ \n' );
%%%%%%%%%1%%%%%%%%%2%%%%%%%%%3%%%%%%%%4%%%%%%%%%5%%%%%%%%%6%%%%%%%%%7%%%%%%
%%
%%  Print the center of the algebraic circle:
%%
%%%%%%%%%1%%%%%%%%%2%%%%%%%%%3%%%%%%%%4%%%%%%%%%5%%%%%%%%%6%%%%%%%%%7%%%%%%
for I = 1:L
%%  Print coordinate number I of the algebraic center:
    fprintf( FileID, '%1.6g&', AlgebraicCenter( I ) );
end
%%%%%%%%%1%%%%%%%%%2%%%%%%%%%3%%%%%%%%4%%%%%%%%%5%%%%%%%%%6%%%%%%%%%7%%%%%%
%%
%%  Print the radius of the algebraic circle:
%%
%%%%%%%%%1%%%%%%%%%2%%%%%%%%%3%%%%%%%%4%%%%%%%%%5%%%%%%%%%6%%%%%%%%%7%%%%%%
    fprintf( FileID, '%1.6g&', AlgebraicRadius );
%%%%%%%%%1%%%%%%%%%2%%%%%%%%%3%%%%%%%%4%%%%%%%%%5%%%%%%%%%6%%%%%%%%%7%%%%%%
%%
%%  Print the sum of squared distances to the algebraic circle:
%%
%%%%%%%%%1%%%%%%%%%2%%%%%%%%%3%%%%%%%%4%%%%%%%%%5%%%%%%%%%6%%%%%%%%%7%%%%%%
    fprintf( FileID, '%1.6g&', AlgebraicSumOfSquares );
%%%%%%%%%1%%%%%%%%%2%%%%%%%%%3%%%%%%%%4%%%%%%%%%5%%%%%%%%%6%%%%%%%%%7%%%%%%
%%
%%  Print the coefficient R2 for the algebraic circle and the Mean point:
%%
%%%%%%%%%1%%%%%%%%%2%%%%%%%%%3%%%%%%%%4%%%%%%%%%5%%%%%%%%%6%%%%%%%%%7%%%%%%
    fprintf( FileID, '%1.6g&', R2AlgebraicCircleAndMean );
%%%%%%%%%1%%%%%%%%%2%%%%%%%%%3%%%%%%%%4%%%%%%%%%5%%%%%%%%%6%%%%%%%%%7%%%%%%
%%
%%  Print the coefficient R2 for the algebraic circle and TLS line:
%%
%%%%%%%%%1%%%%%%%%%2%%%%%%%%%3%%%%%%%%4%%%%%%%%%5%%%%%%%%%6%%%%%%%%%7%%%%%%
    fprintf( FileID, '%1.6g&', R2AlgebraicCircleAndLine );
%%  LaTeX code for carriage return:
    fprintf( FileID, '\n' );
    fprintf( FileID, '\\' );
    fprintf( FileID, '\\ \n' );
%%  LaTeX code for a horizontal line in a table:
    fprintf( FileID, '\\hline\n' );
%%%%%%%%%1%%%%%%%%%2%%%%%%%%%3%%%%%%%%4%%%%%%%%%5%%%%%%%%%6%%%%%%%%%7%%%%%%
%%
%%  ALGEBRAIC CIRCLE:
%%
%%%%%%%%%1%%%%%%%%%2%%%%%%%%%3%%%%%%%%4%%%%%%%%%5%%%%%%%%%6%%%%%%%%%7%%%%%%
    fprintf( FileID, '\\multicolumn{3}{l}{Fitted circle}&\n' );
%%  LaTeX code for carriage return:
    fprintf( FileID, '\\' );
    fprintf( FileID, '\\ \n' );
    fprintf( FileID, '\\multicolumn{2}{c}{Center}&Radius\n' );
%%  LaTeX code for carriage return:
    fprintf( FileID, '\\' );
    fprintf( FileID, '\\ \n' );
%%%%%%%%%1%%%%%%%%%2%%%%%%%%%3%%%%%%%%4%%%%%%%%%5%%%%%%%%%6%%%%%%%%%7%%%%%%
%%
%%  Print the center of the fitted circle:
%%
%%%%%%%%%1%%%%%%%%%2%%%%%%%%%3%%%%%%%%4%%%%%%%%%5%%%%%%%%%6%%%%%%%%%7%%%%%%
for I = 1:L
%%  Print coordinate number I of the fitted center:
    fprintf( FileID, '%1.6g&', FittedCenter( I ) );
end
%%%%%%%%%1%%%%%%%%%2%%%%%%%%%3%%%%%%%%4%%%%%%%%%5%%%%%%%%%6%%%%%%%%%7%%%%%%
%%
%%  Print the radius of the fitted circle:
%%
%%%%%%%%%1%%%%%%%%%2%%%%%%%%%3%%%%%%%%4%%%%%%%%%5%%%%%%%%%6%%%%%%%%%7%%%%%%
    fprintf( FileID, '%1.6g&', FittedRadius );
%%%%%%%%%1%%%%%%%%%2%%%%%%%%%3%%%%%%%%4%%%%%%%%%5%%%%%%%%%6%%%%%%%%%7%%%%%%
%%
%%  Print the sum of squared distances to the fitted circle:
%%
%%%%%%%%%1%%%%%%%%%2%%%%%%%%%3%%%%%%%%4%%%%%%%%%5%%%%%%%%%6%%%%%%%%%7%%%%%%
    fprintf( FileID, '%1.6g&', SumOfSquares );
%%%%%%%%%1%%%%%%%%%2%%%%%%%%%3%%%%%%%%4%%%%%%%%%5%%%%%%%%%6%%%%%%%%%7%%%%%%
%%
%%  Print the coefficient R2 for the fitted circle and the Mean point:
%%
%%%%%%%%%1%%%%%%%%%2%%%%%%%%%3%%%%%%%%4%%%%%%%%%5%%%%%%%%%6%%%%%%%%%7%%%%%%
    fprintf( FileID, '%1.6g&', R2FittedCircleAndMean );
%%%%%%%%%1%%%%%%%%%2%%%%%%%%%3%%%%%%%%4%%%%%%%%%5%%%%%%%%%6%%%%%%%%%7%%%%%%
%%
%%  Print the coefficient R2 for the fitted circle and TLS line:
%%
%%%%%%%%%1%%%%%%%%%2%%%%%%%%%3%%%%%%%%4%%%%%%%%%5%%%%%%%%%6%%%%%%%%%7%%%%%%
    fprintf( FileID, '%1.6g&', R2FittedCircleAndLine );
%%%%%%%%%1%%%%%%%%%2%%%%%%%%%3%%%%%%%%4%%%%%%%%%5%%%%%%%%%6%%%%%%%%%7%%%%%%
%%
%%  Print the coefficient R2 for the fitted circle and algebraic circle:
%%
%%%%%%%%%1%%%%%%%%%2%%%%%%%%%3%%%%%%%%4%%%%%%%%%5%%%%%%%%%6%%%%%%%%%7%%%%%%
    fprintf( FileID, '%1.6g', R2FittedCircleAndAlgebraicCircle );
%%  LaTeX code for carriage return:
    fprintf( FileID, '\n' );
    fprintf( FileID, '\\' );
    fprintf( FileID, '\\ \n' );
%%  LaTeX code for a horizontal line in a table:
    fprintf( FileID, '\\hline\n' );
%%  LaTeX code for the end of a table:
    fprintf( FileID, '\\end{tabular}\n' );
fclose( FileID );
%%%%%%%%%1%%%%%%%%%2%%%%%%%%%3%%%%%%%%4%%%%%%%%%5%%%%%%%%%6%%%%%%%%%7%%%%%%
%%
%%  BASIC PLOT OF DATA, MEAN, AND CENTER, JUST TO CHECK THINGS OUT. 
%%
%%%%%%%%%1%%%%%%%%%2%%%%%%%%%3%%%%%%%%4%%%%%%%%%5%%%%%%%%%6%%%%%%%%%7%%%%%%
%%%%%%%%%1%%%%%%%%%2%%%%%%%%%3%%%%%%%%4%%%%%%%%%5%%%%%%%%%6%%%%%%%%%7%%%%%%
%%
%%  Start a crude plot of the data, mean, and fitted center. 
%%
%%%%%%%%%1%%%%%%%%%2%%%%%%%%%3%%%%%%%%4%%%%%%%%%5%%%%%%%%%6%%%%%%%%%7%%%%%%
MyFontName = 'Times';
MyLineWidth = 1;
MyLineColor = [ 0, 0, 0 ];
MyMarkerColor = [ 0, 0, 0 ];
MyMarkerSize = 12;
MyTextColor = [ 0, 0, 0 ];
MyTextFontSize = 24;
figure
if L == 3
    plot3( Data(:,1),Data(:,2),Data(:,3), '.', ...
        'MarkerSize', MyMarkerSize, 'Color', MyMarkerColor )
    hold on
    plot3( MeanOfData(1),MeanOfData(2),MeanOfData(3), 'o', ...
        'MarkerSize', MyMarkerSize, 'Color', MyMarkerColor )
    hold on
    text( MeanOfData(1),MeanOfData(2),MeanOfData(3), 'Mean', ...
        'Color', MyTextColor, ...
        'FontName', MyFontName, 'FontSize', MyTextFontSize )
    hold on
    plot3( FittedCenter(1),FittedCenter(2),FittedCenter(3), '*', ...
        'MarkerSize', MyMarkerSize, 'Color', MyMarkerColor )
    hold on
    text( FittedCenter(1),FittedCenter(2),FittedCenter(3), 'Center' )
    hold on
elseif L == 2
    plot( Data(:,1),Data(:,2), '.', ...
        'MarkerSize', MyMarkerSize, 'Color', MyMarkerColor )
    hold on
    plot( MeanOfData(1),MeanOfData(2), 'o', ...
        'MarkerSize', MyMarkerSize, 'Color', MyMarkerColor )
    hold on
    text( MeanOfData(1),MeanOfData(2), 'Mean', ...
        'Color', MyTextColor, ...
        'FontName', MyFontName, 'FontSize', MyTextFontSize )
    hold on
    plot( FittedCenter(1),FittedCenter(2), '*', ...
        'MarkerSize', MyMarkerSize, 'Color', MyMarkerColor )
    hold on
    text( FittedCenter(1),FittedCenter(2), 'Center', ...
        'Color', MyTextColor, ...
        'FontName', MyFontName, 'FontSize', MyTextFontSize )
    hold on
    for I = 1:N
        Arguments( I ) = atan2( Data( I, 2 ) - FittedCenter(2), ...
            Data( I, 1 ) - FittedCenter(1) ); 
    end
    Alpha = min( Arguments );
    Beta = max( Arguments );
    NumberOfPoints = 100; 
    Angles = Alpha:(Beta-Alpha)/NumberOfPoints:Beta;
    plot( FittedCenter(1) + FittedRadius*cos( Angles ), ...
        FittedCenter(2) + FittedRadius*sin( Angles ), '-',...
        'LineWidth', MyLineWidth, 'Color', MyLineColor );
 end
axis equal
hold on
%%%%%%%%%1%%%%%%%%%2%%%%%%%%%3%%%%%%%%4%%%%%%%%%5%%%%%%%%%6%%%%%%%%%7%%%%%%
%%
%%  Here the use may modify some of the plot from Matlab's command window. 
%%
%%%%%%%%%1%%%%%%%%%2%%%%%%%%%3%%%%%%%%4%%%%%%%%%5%%%%%%%%%6%%%%%%%%%7%%%%%%
%%%%%%%%%1%%%%%%%%%2%%%%%%%%%3%%%%%%%%4%%%%%%%%%5%%%%%%%%%6%%%%%%%%%7%%%%%%
%%
%%  End of the crude plot of the data, mean, and fitted center. 
%%
%%%%%%%%%1%%%%%%%%%2%%%%%%%%%3%%%%%%%%4%%%%%%%%%5%%%%%%%%%6%%%%%%%%%7%%%%%%
%%%%%%%%%1%%%%%%%%%2%%%%%%%%%3%%%%%%%%4%%%%%%%%%5%%%%%%%%%6%%%%%%%%%7%%%%%%
%%
%%  Estimate the sensitivities of fitted parameters relative to the data. 
%%  Because of its size ( L x N x L ), the array of sensitivities 
%%  is computed only if it is requested.
%%
%%%%%%%%%1%%%%%%%%%2%%%%%%%%%3%%%%%%%%4%%%%%%%%%5%%%%%%%%%6%%%%%%%%%7%%%%%%
if nargout > 9
%     CenteredData = ones( size( Data ) )*diag( FittedCenter ) - Data;  
% %%  Compute all the distances (radii) from the FITTED center to points:
%     Radii = sqrt( diag( CenteredData*( CenteredData' ) ) );  
% %%  Compute the mean of the distances from the current center to points:
%     FittedRadius = mean( Radii );
%%  The array of all sensitvities has dimensions L x N x L with L columns
%%  DCenterDxij, 1 <= j <= N, x1, ..., xL
%     ReciprocalRadii = 1./Radii;
    Sensitivities = zeros( L, N, L );
%%  Partial derivatives of the distances relative to the center's x, y, ... 
    DdDxjs = CenteredDataOverRadii;
%%  The only component of the vector of residuals depending on  xj  is  jth
%%  For each variable  x, y, ... 
    for I = 1:L
    Sensitivity = zeros( size( Data ) )';
%%  For each datum 1, 2, ..., N
        for J = 1:N
%%  Make the array of partial derivatives of the residuals relative to  xj
%%  First zero out all the entries
            DrhoDxjs = zeros( N, 1 );  
%%  Second copy DdjDxj in position j, still dealing with coordinate I
            DrhoDxjs( J ) = DdDxjs( J, I );  
%%  Third subtract the mean from all the entries
            meanDrhoDxs = mean( DrhoDxjs );
            DrhoDxjs = DrhoDxjs - meanDrhoDxs*ones( size( DrhoDxjs ) );  
%%  The result is now the vector DrhoDx = -DrhoDxj
%%  Fourth solve the linear least-suquares system
            Sensitivity( :, J ) = mldivide( FullJacobian, DrhoDxjs );  
        end
        Sensitivities( :, :, I ) = Sensitivity; 
    end
end
%%%%%%%%%1%%%%%%%%%2%%%%%%%%%3%%%%%%%%4%%%%%%%%%5%%%%%%%%%6%%%%%%%%%7%%%%%%
%%
%%  End of the sensitivities of fitted parameters relative to the data. 
%%
%%%%%%%%%1%%%%%%%%%2%%%%%%%%%3%%%%%%%%4%%%%%%%%%5%%%%%%%%%6%%%%%%%%%7%%%%%%
%%%%%%%%%1%%%%%%%%%2%%%%%%%%%3%%%%%%%%4%%%%%%%%%5%%%%%%%%%6%%%%%%%%%7%%%%%%
%%
%%  Here  FitCircleAlgebraically  provided  Radius = Inf.
%%  The fitted line or plane passes through  mean(Data)  normal to  Center.
%%
%%%%%%%%%1%%%%%%%%%2%%%%%%%%%3%%%%%%%%4%%%%%%%%%5%%%%%%%%%6%%%%%%%%%7%%%%%%
else
%%%%%%%%%1%%%%%%%%%2%%%%%%%%%3%%%%%%%%4%%%%%%%%%5%%%%%%%%%6%%%%%%%%%7%%%%%%
%%
%%  Insert your code here to handle a line or plane.
%%
%%%%%%%%%1%%%%%%%%%2%%%%%%%%%3%%%%%%%%4%%%%%%%%%5%%%%%%%%%6%%%%%%%%%7%%%%%%
    [ FittedCenter, FittedRadius, SumOfSquares, Hessian, Residuals, ...
        Jacobian, ExitFlag, Output, Lambda, Sensitivities ] = ... 
    [ AlgebraicCenter, AlgebraicRadius, ...
        NaN, NaN, NaN, NaN, NaN, NaN, NaN, NaN ]; 
end
%%%%%%%%%1%%%%%%%%%2%%%%%%%%%3%%%%%%%%4%%%%%%%%%5%%%%%%%%%6%%%%%%%%%7%%%%%%
%%
%%  END COMPUTATIONS. 
%%
%%%%%%%%%1%%%%%%%%%2%%%%%%%%%3%%%%%%%%4%%%%%%%%%5%%%%%%%%%6%%%%%%%%%7%%%%%%
%%%%%%%%%1%%%%%%%%%2%%%%%%%%%3%%%%%%%%4%%%%%%%%%5%%%%%%%%%6%%%%%%%%%7%%%%%%
%%
%%  End of the various initial tests on the data.
%%
%%%%%%%%%1%%%%%%%%%2%%%%%%%%%3%%%%%%%%4%%%%%%%%%5%%%%%%%%%6%%%%%%%%%7%%%%%%
end
%%%%%%%%%1%%%%%%%%%2%%%%%%%%%3%%%%%%%%4%%%%%%%%%5%%%%%%%%%6%%%%%%%%%7%%%%%%
%%
%%  End of the function  FitCircleOrSphereToData
%%
%%%%%%%%%1%%%%%%%%%2%%%%%%%%%3%%%%%%%%4%%%%%%%%%5%%%%%%%%%6%%%%%%%%%7%%%%%%
end
%%%%%%%%%1%%%%%%%%%2%%%%%%%%%3%%%%%%%%4%%%%%%%%%5%%%%%%%%%6%%%%%%%%%7%%%%%%
%%
%%  End of the file  FitCircleOrSphereToData.m
%%
%%%%%%%%%1%%%%%%%%%2%%%%%%%%%3%%%%%%%%4%%%%%%%%%5%%%%%%%%%6%%%%%%%%%7%%%%%%
